# Supplementary material for: Root water uptake patterns are controlled by tree species interactions and soil water variability
Source: Copernicus journal article supplement (doi:10.5194/hess-28-1441-2024), 2024-04-02
Supplement: Supplementary file 1 [file hess-28-1441-2024-supplement.pdf]

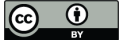

*Supplement of*

## **Root water uptake patterns are controlled by tree species interactions and soil water variability**

**Gökben Demir et al.**

*Correspondence to:* Gökben Demir ([goekben.demir@uni-jena.de](mailto:goekben.demir@uni-jena.de)) and Anke Hildebrandt ([anke.hildebrandt@ufz.de](mailto:anke.hildebrandt@ufz.de))

The copyright of individual parts of the supplement might differ from the article licence.

Supplement

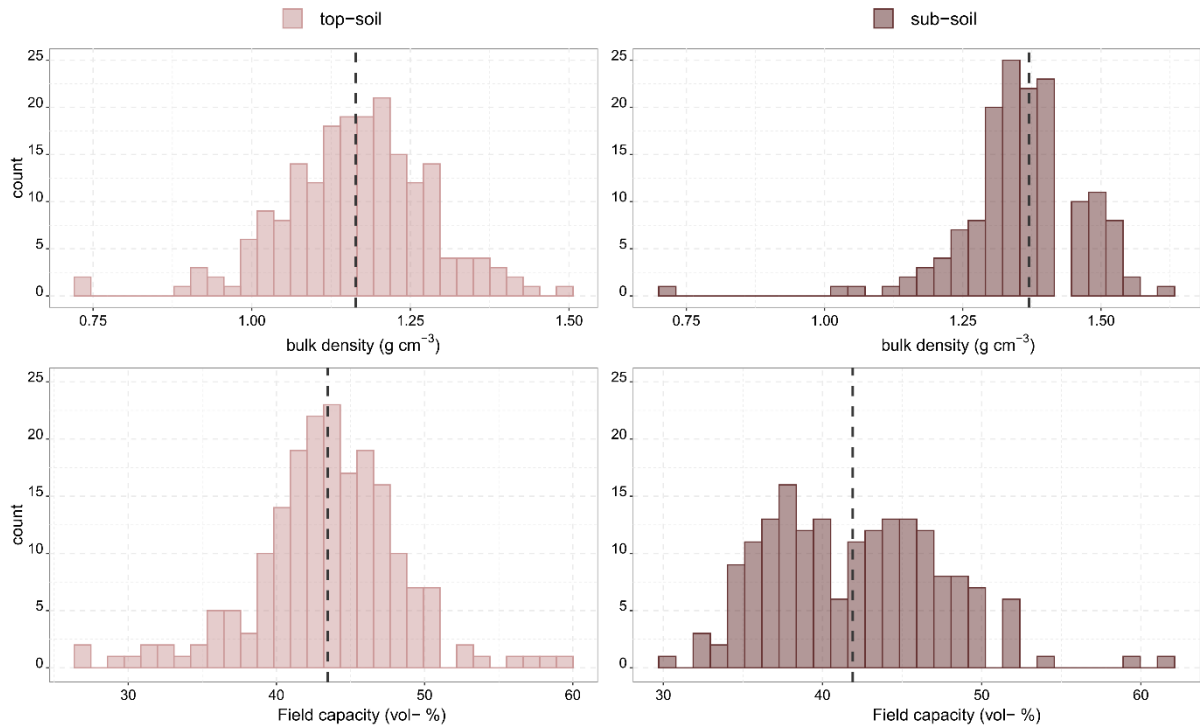

**Figure S1** Histogram of the soil bulk density and volumetric water content at field capacity in the research site.

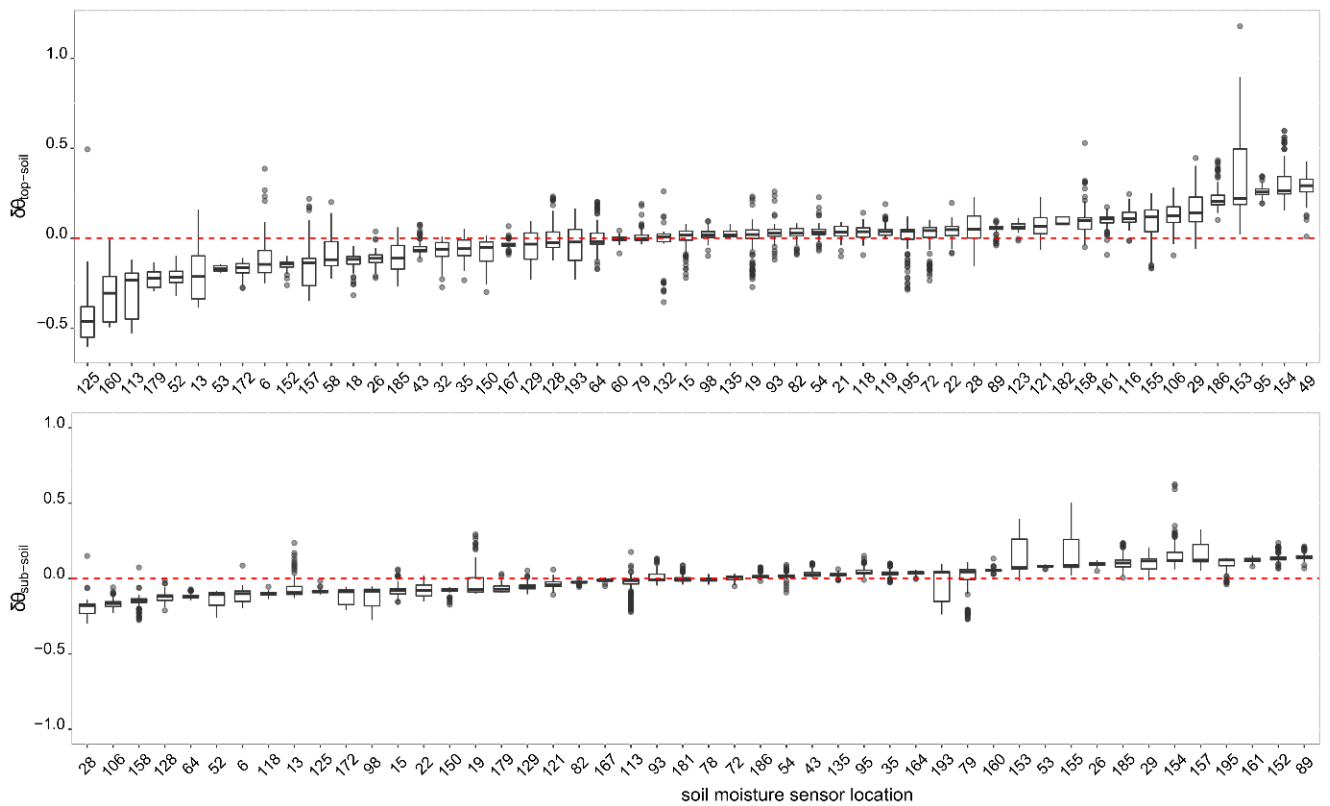

**Figure S2** Temporal stability of soil water content at top and subsoil based on the spatial deviation of the measurements recorded at all sensor locations throughout the sampling period (April-August 2019)

Supplement

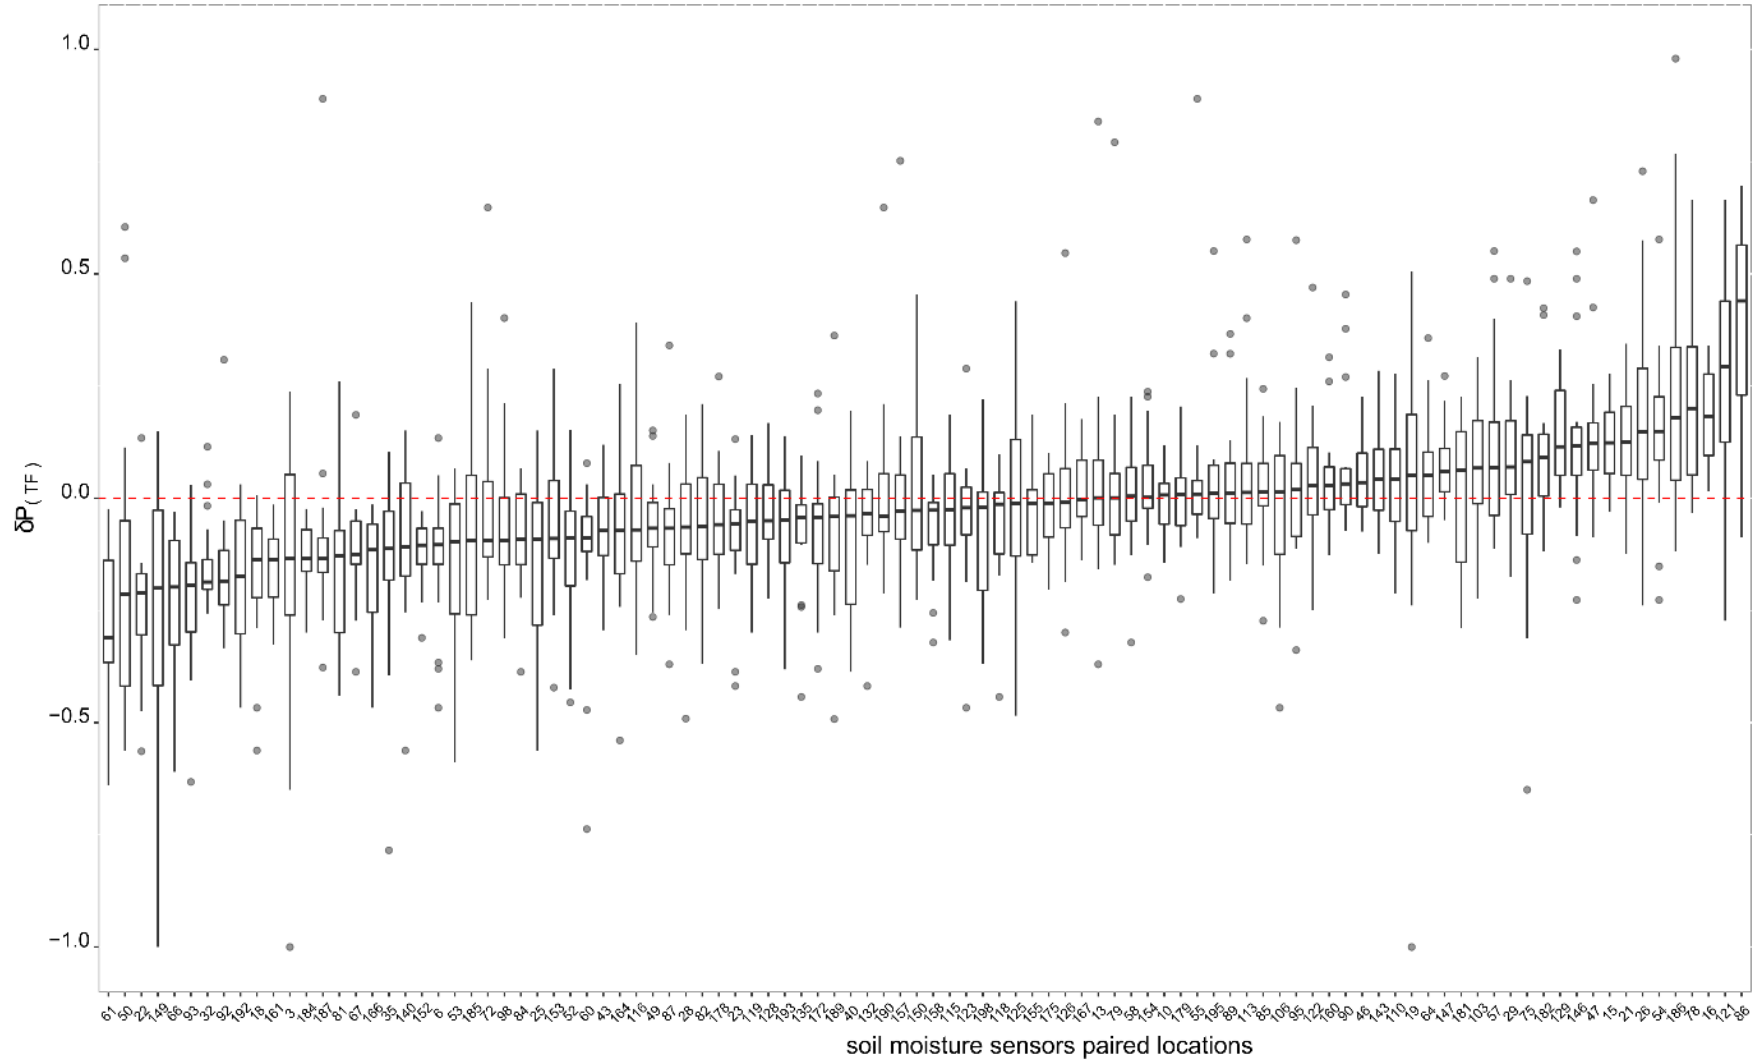

**Figure S3** Temporal stability of throughfall patterns based on the spatial deviation of the paired throughfall collectors' measurements in 2019 (April-August).

## Supplement

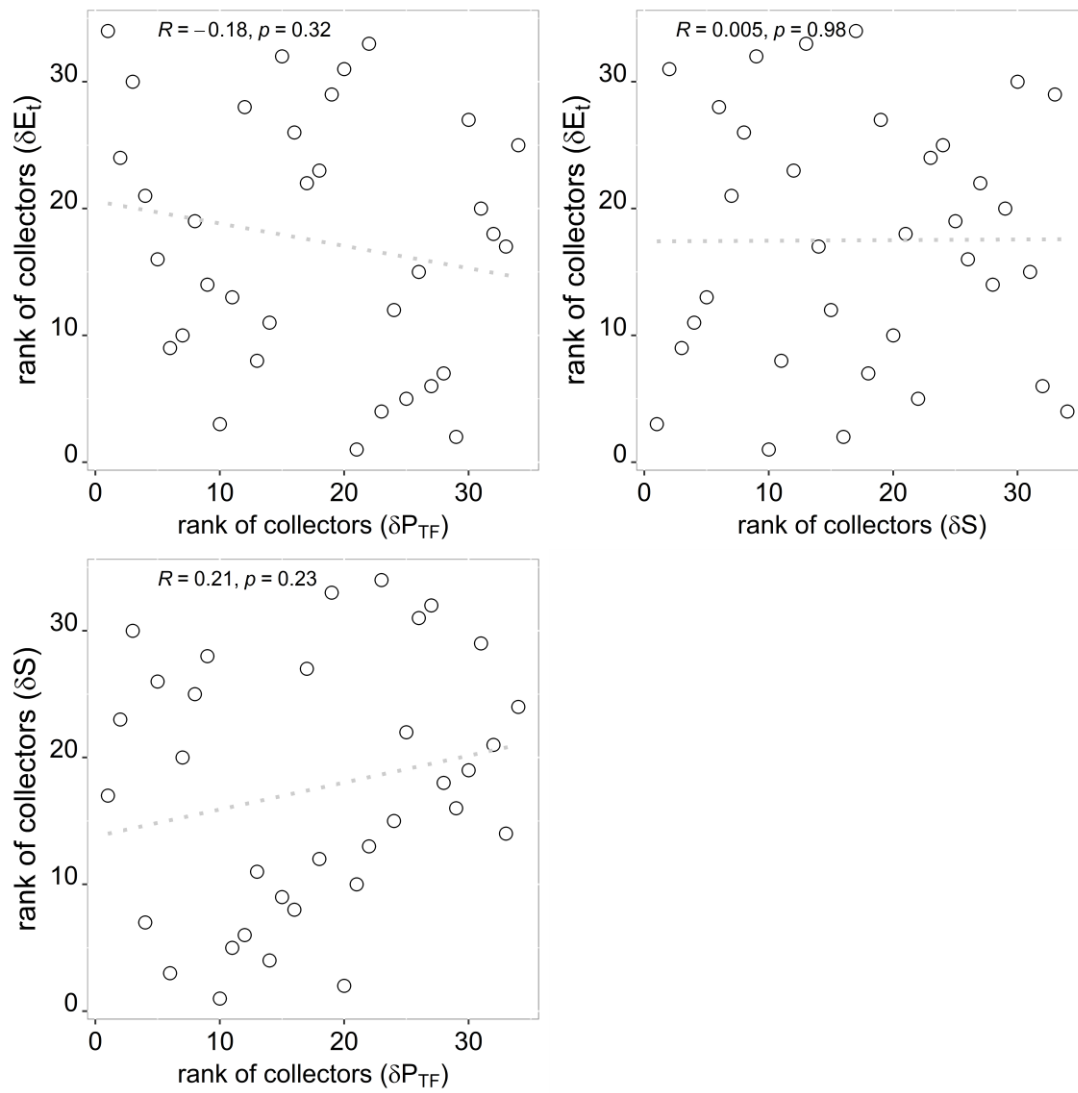

**Figure S4** The Pearson correlation plots of the patterns: (left-above) root water uptake-throughfall, (right above) root water uptake-soil water, and (left below) soil water-throughfall patterns. The correlation coefficient is shown with 'R' together with the level of significance ( $p$ ).

**Supplement**

**Table S1** The summary of the optimal model. Signif. codes: ≈0 ‘\*\*\*’ 0.001 ‘\*\*’ 0.01 ‘\*’ 0.05 ‘.’ 0.1 ‘.’1

| <b>Fixed Factors (single)</b>                                                                                           | <b>Estimate</b> | <b>p- value</b> | <b>t-value</b> |
|-------------------------------------------------------------------------------------------------------------------------|-----------------|-----------------|----------------|
| Spatial average of soil water storage in the monitored soil layer ( $\bar{S}$ )                                         | 0.11            | 0.32            | -1.032         |
| Spatial deviation of soil water storage from the mean ( $\delta S$ )                                                    | 0.44            | 0.000158***     | 3.880          |
| Field capacity of the monitored soil layer ( $S_{FC}$ )                                                                 | - 0.12          | 0.505984        | -0.675         |
| The median of spatial deviation of throughfall measured within the whole sampling period ( $\overline{\delta P_{TF}}$ ) | 0.25            | 0.072182*       | -1.887         |
| Inverse distanced basal area (BA)                                                                                       | - 0.03          | 0.876059        | -0.158         |
| Number of species ( $n_{sp,tree}$ )                                                                                     | 0.02            | 0.927599        | 0.092          |
| <b>Fixed Factors in an interaction</b>                                                                                  |                 |                 |                |
| $\delta S \times S_{FC}$                                                                                                | - 0.35          | 0.000916***     | -3.420         |
| $\bar{S} \times BA$                                                                                                     | 0.15            | 0.004420**      | 2.888          |
| $n_{sp,tree} \times BA$                                                                                                 | 1.05            | 0.000444***     | 4.254          |
| <b>Random factors</b>                                                                                                   |                 |                 |                |
|                                                                                                                         | <b>Variance</b> | <b>Std.Dev</b>  |                |
| Soil moisture sensor location                                                                                           | 0.54            | 0.73            |                |
| Dry period                                                                                                              | 0.09            | 0.31            |                |
| Residual                                                                                                                | 0.37            | 0.61            |                |
| REML criterion at convergence                                                                                           | 415.8           |                 |                |
| AIC                                                                                                                     | 441.8043        |                 |                |

**Table S2:** Correlation of Fixed Effects of the optimal model

| <b>Fixed factors</b>       |        |        |        |        |        |        |        |        |  |
|----------------------------|--------|--------|--------|--------|--------|--------|--------|--------|--|
| $\bar{S}$                  | -0.2   |        |        |        |        |        |        |        |  |
| $\delta S$                 | 0.084  | -0.237 |        |        |        |        |        |        |  |
| $S_{FC}$                   | -0.023 | 0.016  | -0.227 |        |        |        |        |        |  |
| $\overline{\delta P_{TF}}$ | -0.093 | 0.057  | -0.185 | 0.047  |        |        |        |        |  |
| BA                         | 0.069  | -0.034 | 0.045  | 0.059  | -0.023 |        |        |        |  |
| $n_{sp,tree}$              | 0.017  | 0.032  | -0.238 | 0.110  | 0.120  | 0.291  |        |        |  |
| $\delta S \times S_{FC}$   | -0.083 | -0.073 | 0.195  | -0.384 | -0.047 | -0.017 | 0.043  |        |  |
| $\bar{S} \times BA$        | 0.042  | -0.194 | 0.171  | -0.010 | -0.073 | 0.047  | -0.043 | 0.083  |  |
| $n_{sp,tree} \times BA$    | 0.251  | -0.102 | 0.167  | -0.135 | -0.001 | 0.229  | 0.368  | -0.105 |  |
